# Supplementary material for: Cardiovascular Mortality During the COVID-19 Pandemics in a Large Brazilian City: A Comprehensive Analysis
Source: PubMed Central journal article supplement (PMC8877643; doi:10.5334/gh.1101), 2022-02-21
Supplement: gh-17-1-1101-s1.pdf [file gh-17-1-1101-s1.pdf]

**Supplementary Material 1: Percent of hospital admissions processed in each month from the total of admissions in the respective month in 2019 and 2020, Hospital Information System, Belo Horizonte, MG, Brazil.**

|                          |         | Processing Month |         |         |         |         |         |         |         |         |         |         |         |         |         |         |         |         |
|--------------------------|---------|------------------|---------|---------|---------|---------|---------|---------|---------|---------|---------|---------|---------|---------|---------|---------|---------|---------|
|                          |         | 2019-01          | 2019-02 | 2019-03 | 2019-04 | 2019-05 | 2019-06 | 2019-07 | 2019-08 | 2019-09 | 2019-10 | 2019-11 | 2019-12 | 2020-01 | 2020-02 | 2020-03 | 2020-04 | 2020-05 |
| Hospital Admission Month | 2019-01 | 32.32            | 41.01   | 16.58   | 8.25    | 1.24    | 0.36    | 0.06    | 0.02    | 0.02    | 0.02    | 0.02    | 0.01    | 0.01    | 0.01    | 0.01    | 0.01    | 0.01    |
|                          | 2019-02 | 0                | 33.1    | 43.07   | 14.85   | 7.32    | 1.33    | 0.29    | 0.03    | 0       | 0.01    | 0       | 0       | 0       | 0       | 0       | 0       | 0       |
|                          | 2019-03 | 0                | 0       | 33.81   | 40.45   | 16.94   | 7.15    | 1.23    | 0.32    | 0.07    | 0.02    | 0.02    | 0       | 0       | 0       | 0       | 0       | 0       |
|                          | 2019-04 | 0                | 0       | 0       | 37.23   | 37.78   | 16.01   | 7.54    | 1.01    | 0.32    | 0.05    | 0.01    | 0.01    | 0.01    | 0.01    | 0       | 0.01    | 0.01    |
|                          | 2019-05 | 0                | 0       | 0       | 0       | 35.97   | 38.93   | 16.02   | 7.43    | 1.19    | 0.3     | 0.04    | 0.01    | 0.01    | 0.01    | 0.01    | 0.01    | 0.01    |
|                          | 2019-06 | 0                | 0       | 0       | 0       | 0       | 32.36   | 45.87   | 13.17   | 6.98    | 1.25    | 0.34    | 0.03    | 0       | 0       | 0       | 0       | 0       |
|                          | 2019-07 | 0                | 0       | 0       | 0       | 0       | 0       | 37.18   | 42.31   | 12.08   | 6.87    | 1.07    | 0.39    | 0.09    | 0.02    | 0.01    | 0       | 0       |
|                          | 2019-08 | 0                | 0       | 0       | 0       | 0       | 0       | 0       | 37.62   | 41.18   | 12.54   | 6.46    | 1.58    | 0.44    | 0.07    | 0.03    | 0.02    | 0.02    |
|                          | 2019-09 | 0                | 0       | 0       | 0       | 0       | 0       | 0       | 0       | 35.65   | 44.73   | 9.96    | 7.8     | 1.39    | 0.39    | 0.06    | 0.01    | 0       |
|                          | 2019-10 | 0                | 0       | 0       | 0       | 0       | 0       | 0       | 0       | 0       | 39.51   | 36.19   | 12.6    | 9.99    | 1.13    | 0.49    | 0.06    | 0.01    |
|                          | 2019-11 | 0                | 0       | 0       | 0       | 0       | 0       | 0       | 0       | 0       | 0       | 37.76   | 34.52   | 17.56   | 8.39    | 1.33    | 0.37    | 0.06    |
|                          | 2019-12 | 0                | 0       | 0       | 0       | 0       | 0       | 0       | 0       | 0       | 0       | 0       | 36.4    | 34.17   | 20.21   | 7.75    | 1.09    | 0.28    |
