# Supplementary material for: Cardiovascular Mortality During the COVID-19 Pandemics in a Large Brazilian City: A Comprehensive Analysis
Source: PubMed Central journal article supplement (PMC8877643; doi:10.5334/gh.1101), 2022-02-21
Supplement: gh-17-1-1101-s2.pdf [file gh-17-1-1101-s2.pdf]

## SUPPLEMENTARY MATERIAL 2

### Tutorial to access data

The following tutorial intends to help any user to access datasets from the Brazilian Ministry of Health Mortality and Hospitalization systems. It is important to emphasize that the dataset that we used in our research is part of the same information system, but it has sensitive information that unable us to share it as it is.

### HOSPITAL INFORMATION SYSTEM (SISTEMA DE INFORMAÇÕES HOSPITALARES, SIH)

1. Access datasus webpage where the data is stored.

<https://datasus.saude.gov.br/transferecia-de-arquivos/>

2. In the box named 'Download de arquivos', select the option 'SIHSUS – Sistema de Informações Hospitalares'

## Download de arquivos

Fonte

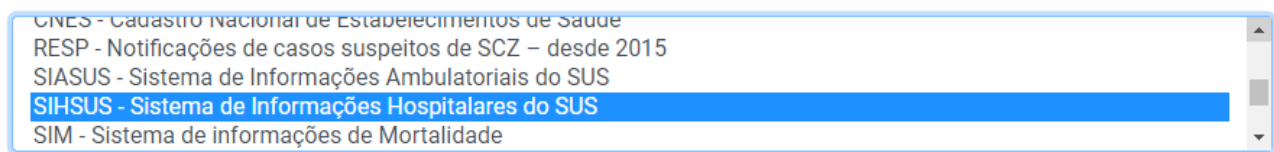

3. In the box named 'Modalidade', select the option 'Dados'

|                                                                                                                                                                |                                                                                                                                                                                                                        |
|----------------------------------------------------------------------------------------------------------------------------------------------------------------|------------------------------------------------------------------------------------------------------------------------------------------------------------------------------------------------------------------------|
| <p>Modalidade</p> <div style="border: 1px solid #ccc; padding: 5px;"> <p>Arquivos auxiliares para tabulação</p> <p><b>Dados</b></p> <p>Documentação</p> </div> | <p>Tipo de Arquivo</p> <div style="border: 1px solid #ccc; padding: 5px;"> <p>ER - AIH Rejeitadas com código de erro</p> <p>RD - AIH Reduzida</p> <p>RJ - AIH Rejeitadas</p> <p>SP - Serviços Profissionais</p> </div> |
|----------------------------------------------------------------------------------------------------------------------------------------------------------------|------------------------------------------------------------------------------------------------------------------------------------------------------------------------------------------------------------------------|

4. In the box named 'Tipo de Arquivo', select the option 'RD – AIH Reduzida'

|                                                                                                                                                                |                                                                                                                                                                                                                               |
|----------------------------------------------------------------------------------------------------------------------------------------------------------------|-------------------------------------------------------------------------------------------------------------------------------------------------------------------------------------------------------------------------------|
| <p>Modalidade</p> <div style="border: 1px solid #ccc; padding: 5px;"> <p>Arquivos auxiliares para tabulação</p> <p><b>Dados</b></p> <p>Documentação</p> </div> | <p>Tipo de Arquivo</p> <div style="border: 1px solid #ccc; padding: 5px;"> <p>ER - AIH Rejeitadas com código de erro</p> <p><b>RD - AIH Reduzida</b></p> <p>RJ - AIH Rejeitadas</p> <p>SP - Serviços Profissionais</p> </div> |
|----------------------------------------------------------------------------------------------------------------------------------------------------------------|-------------------------------------------------------------------------------------------------------------------------------------------------------------------------------------------------------------------------------|

5. In the box named 'Ano', select the year or set of years of interest.

|                                                                                                                                          |                                                                                                                                             |
|------------------------------------------------------------------------------------------------------------------------------------------|---------------------------------------------------------------------------------------------------------------------------------------------|
| <p>Ano</p> <div style="border: 1px solid #ccc; padding: 5px;"> <p>2019</p> <p><b>2018</b></p> <p>2017</p> <p>2016</p> <p>2015</p> </div> | <p>Mês</p> <div style="border: 1px solid #ccc; padding: 5px;"> <p>Janeiro</p> <p>Fevereiro</p> <p>Março</p> <p>Abril</p> <p>Maio</p> </div> |
|------------------------------------------------------------------------------------------------------------------------------------------|---------------------------------------------------------------------------------------------------------------------------------------------|

6. In the box named 'Mês', select the month or set of months of interest.

Ano

Mês

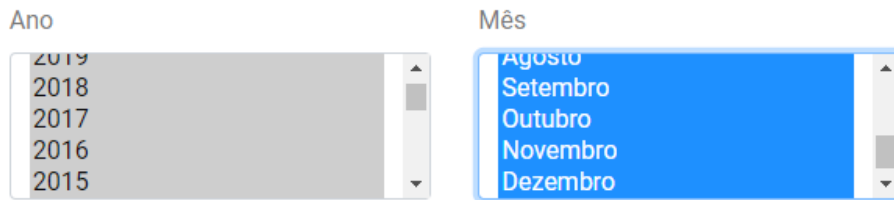

The image shows two dropdown menus. The first, labeled 'Ano', has a list of years: 2019, 2018, 2017, 2016, and 2015. The second, labeled 'Mês', has a list of months: Agosto, Setembro, Outubro, Novembro, and Dezembro. Both menus have a blue highlight on the top item.

7. In the last box, named UF, choose the Brazilian state of interest. Belo Horizonte is located in Minas Gerais State, 'MG'. Then, select 'Enviar'.

UF



The image shows a dropdown menu labeled 'UF' with the following options: ES, GO, MA, MG, and MS. The option 'MG' is highlighted in blue. Below the dropdown menu is a button labeled 'Enviar'.

8. The selected files will be listed, at the bottom of the list you will see the download button. Files are named as 'RD'+name of the STATE +year(Y)+month(MM)+' .dbc'

### **MORTALITY INFORMATION SYSTEM (SISTEMA DE INFORMAÇÕES SOBRE MORTALIDADE, SIM)**

1. Access datasus webpage where the data is stored (same as above).

<https://datasus.saude.gov.br/transferencia-de-arquivos/>

2. In the box named 'Download de arquivos', select the option "SIM- Sistema de Informações de Mortalidade"

## Download de arquivos

Fonte

SIASUS - Sistema de Informações Ambulatoriais do SUS  
SIHSUS - Sistema de Informações Hospitalares do SUS  
**SIM - Sistema de Informações de Mortalidade**  
SINAN - Sistema de agravos de notificação compulsória

Modalidade

Arquivos auxiliares para tabulação  
Dados  
Documentação

Tipo de Arquivo

Enviar

3. In the box named 'Modalidade', select the option 'Dados'

Modalidade

Arquivos auxiliares para tabulação  
**Dados**  
Documentação

Tipo de Arquivo

**DO - Declarações de Óbito - 1979 a 2020**  
DOEXT - Declarações de Óbitos por causas externas - 1979 a 2020  
DOFET - Declarações de Óbitos fetais - 1979 a 2020  
DOINF - Declarações de Óbitos infantis - 1979 a 2020

4. In the box named 'Tipo de Arquivo', select the option 'DO – Declaração de Óbito – 1979 a 2020'

Modalidade

Arquivos auxiliares para tabulação  
Dados  
Documentação

Tipo de Arquivo

**DO - Declarações de Óbito - 1979 a 2020**  
DOEXT - Declarações de Óbitos por causas externas - 1979 a 2020  
DOFET - Declarações de Óbitos fetais - 1979 a 2020  
DOINF - Declarações de Óbitos infantis - 1979 a 2020

5. In the box named 'Ano', select the year or set of years of interest.

Ano

2019  
2018  
2017  
2016  
2015

6. In the last box, named UF, choose the Brazilian state of interest. Belo Horizonte is located in Minas Gerais State, 'MG'. Then, select 'Enviar'.

UF

ES  
GO  
MA  
**MG**  
MS

Enviar

7. The selected files will be listed, and at the bottom of the list you will see the download button. Files are named as 'DP'+name of the STATE (MG) +year(YY)'.dbc'

| # |                                     | Fonte | Modalidade           | Tipo de Arquivo              |
|---|-------------------------------------|-------|----------------------|------------------------------|
| 0 | <input checked="" type="checkbox"/> | SIM   | Dados - Finais       | <a href="#">DOMG2015.dbc</a> |
| 1 | <input checked="" type="checkbox"/> | SIM   | Dados - Finais       | <a href="#">DOMG2016.dbc</a> |
| 2 | <input checked="" type="checkbox"/> | SIM   | Dados - Finais       | <a href="#">DOMG2017.dbc</a> |
| 3 | <input checked="" type="checkbox"/> | SIM   | Dados - Finais       | <a href="#">DOMG2018.dbc</a> |
| 4 | <input checked="" type="checkbox"/> | SIM   | Dados - Finais       | <a href="#">DOMG2019.dbc</a> |
| 5 | <input checked="" type="checkbox"/> | SIM   | Dados - Preliminares | <a href="#">DOMG2020.dbc</a> |

[Download](#)
