# Supplementary material for: Cardiovascular Mortality During the COVID-19 Pandemics in a Large Brazilian City: A Comprehensive Analysis
Source: PubMed Central journal article supplement (PMC8877643; doi:10.5334/gh.1101), 2022-02-21
Supplement: gh-17-1-1101-s3.pdf [file gh-17-1-1101-s3.pdf]

**Supplementary Material 3: Age-standardized rates per 100,000 inhabitants and proportions for ICD Chapter XVIII outcomes observed in 2020, and expected (mean of 2015-2019), for epidemiological weeks 10-48, their absolute difference, and risk ratio. Belo Horizonte MG, Brazil.**

|                      | Observed        | Expected       | Absolute Difference | Risk Ratio           |
|----------------------|-----------------|----------------|---------------------|----------------------|
| Deaths               | 33<br>(30;37)   | 39<br>(36;43)  | -6.4                | 0.84<br>(0.73;0.96)* |
| Deaths at Home       | 21<br>(19;24)   | 25<br>(22;28)  | -3.7                | 0.85<br>(0.72;1.01)  |
| % Deaths at Home     | 64<br>(59;69)   | 63<br>(59;68)  | 1.0                 | 1.02<br>(0.86;1.2)   |
| Hosp. Admissions     | 100<br>(95;106) | 98<br>(92;104) | 2.4                 | 1.02<br>(0.94;1.11)  |
| ICU                  | 20<br>(18;23)   | 19<br>(16;21)  | 1.7                 | 1.09<br>(0.9;1.31)   |
| % ICU                | 20<br>(18;22)   | 19<br>(17;21)  | 1.2                 | 1.06<br>(0.88;1.28)  |
| In-Hospital Deaths   | 7<br>(5;9)      | 8<br>(6;9)     | -0.7                | 0.91<br>(0.67;1.23)  |
| % In-Hospital Deaths | 7<br>(5;8)      | 8<br>(6;9)     | -0.9                | 0.89<br>(0.66;1.2)   |

ICD: International Classification of Diseases, ICU: intensive care unit
