# Supplementary material for: Cardiovascular Mortality During the COVID-19 Pandemics in a Large Brazilian City: A Comprehensive Analysis
Source: PubMed Central journal article supplement (PMC8877643; doi:10.5334/gh.1101), 2022-02-21
Supplement: gh-17-1-1101-s4.pdf [file gh-17-1-1101-s4.pdf]

**Supplementary Material 4: Age-standardized rates per 100,00 inhabitants and proportions for cardiovascular disease outcomes observed in 2020, and expected (mean of 2015-2019) for epidemiological weeks 10-48, their absolute difference, and risk ratio, according to age range. Belo Horizonte, MG, Brazil.**

| Variable             | 30-59            |               |                     |                      | 60+                 |                     |                     |                      |
|----------------------|------------------|---------------|---------------------|----------------------|---------------------|---------------------|---------------------|----------------------|
|                      | Observed         | Expected      | Absolute Difference | Risk Ratio           | Observed            | Expected            | Absolute Difference | Risk Ratio           |
| Deaths               | 50<br>(46;55)    | 55 (50;61)    | -5.11               | 0.91<br>(0.79;1.04)  | 734 (706;764)       | 715<br>(686;744)    | 19.63               | 1.03<br>(0.97;1.09)  |
| Deaths at Home       | 15<br>(13;18)    | 14 (12;17)    | 1.31                | 1.09<br>(0.85;1.4)   | 253 (236;271)       | 185<br>(170;200)    | 68.20               | 1.37<br>(1.23;1.52)* |
| % Deaths at Home     | 31<br>(26;35)    | 25 (21;29)    | 5.19                | 1.2<br>(0.93;1.54)   | 34 (32;36)          | 25<br>(24;27)       | 8.59                | 1.33<br>(1.2;1.48)*  |
| Hosp. Admissions     | 387 (374;401)    | 583 (567;600) | -196.07             | 0.66<br>(0.63;0.69)* | 1760<br>(1716;1807) | 2123<br>(2074;2174) | -362.80             | 0.83<br>(0.8;0.86)*  |
| ICU                  | 150<br>(141;158) | 175 (166;184) | -25.15              | 0.86<br>(0.79;0.92)* | 669 (642;698)       | 751<br>(722;782)    | -82.43              | 0.89<br>(0.84;0.94)* |
| % ICU                | 38<br>(37;40)    | 30<br>(28;31) | 8.69                | 1.29<br>(1.19;1.39)* | 38 (36;39)          | 35<br>(34;36)       | 2.61                | 1.07<br>(1.01;1.14)* |
| In-Hospital Deaths   | 14<br>(12;17)    | 18<br>(15;21) | -3.77               | 0.8<br>(0.63;1.01)   | 135 (123;149)       | 148<br>(135;162)    | -12.69              | 0.91<br>(0.8;1.04)   |
| % In-Hospital Deaths | 3<br>(3;4)       | 3<br>(2;3)    | 0.64                | 1.2<br>(0.95;1.53)   | 7<br>(7;8)          | 7<br>(6;7)          | 0.73                | 1.1<br>(0.97;1.25)   |

ICU: intensive care unit
